# Supplementary material for: Enhanced electrocatalytic performance of cobalt oxide nanocubes incorporating reduced graphene oxide as a modified platinum electrode for methanol oxidation
Source: Royal Society of Chemistry journal article supplement (doi:10.1039/c4ra08952a), 2014-01-01
Supplement: c4ra08952a1.pdf [file c4ra08952a1.pdf]

## RSC ADVANCES

### Supplementary Information

# Enhanced electrocatalytic performance of cobalt oxide nanocubes incorporated reduced graphene oxide as a modified platinum electrode for methanol oxidation

**Muhammad Mehmood Shahid<sup>1</sup>, Alagarsamy Pandikumar<sup>1\*</sup>, Amir Moradi Golsheikh<sup>1</sup>,**

**Nay Ming Huang<sup>1\*</sup>, Hong Ngee Lim<sup>2,3\*</sup>**

<sup>1</sup>Low Dimensional Materials Research Centre, Department of Physics, Faculty of Science,  
University of Malaya, 50603 Kuala Lumpur, Malaysia

<sup>2</sup>Department of Chemistry, Faculty of Science, Universiti Putra Malaysia, 43400 UPM  
Serdang, Selangor, Malaysia

<sup>3</sup>Functional Device Laboratory, Institute of Advanced Technology, Universiti Putra Malaysia,  
43400 UPM Serdang, Selangor, Malaysia

Corresponding author's: [huangnayming@um.edu.my](mailto:huangnayming@um.edu.my) (N. M. Huang),  
[pandikumarinbox@gmail.com](mailto:pandikumarinbox@gmail.com) (A. Pandikumar), and  
[janet\\_limhn@science.upm.edu.my](mailto:janet_limhn@science.upm.edu.my) (H. N. Lim)

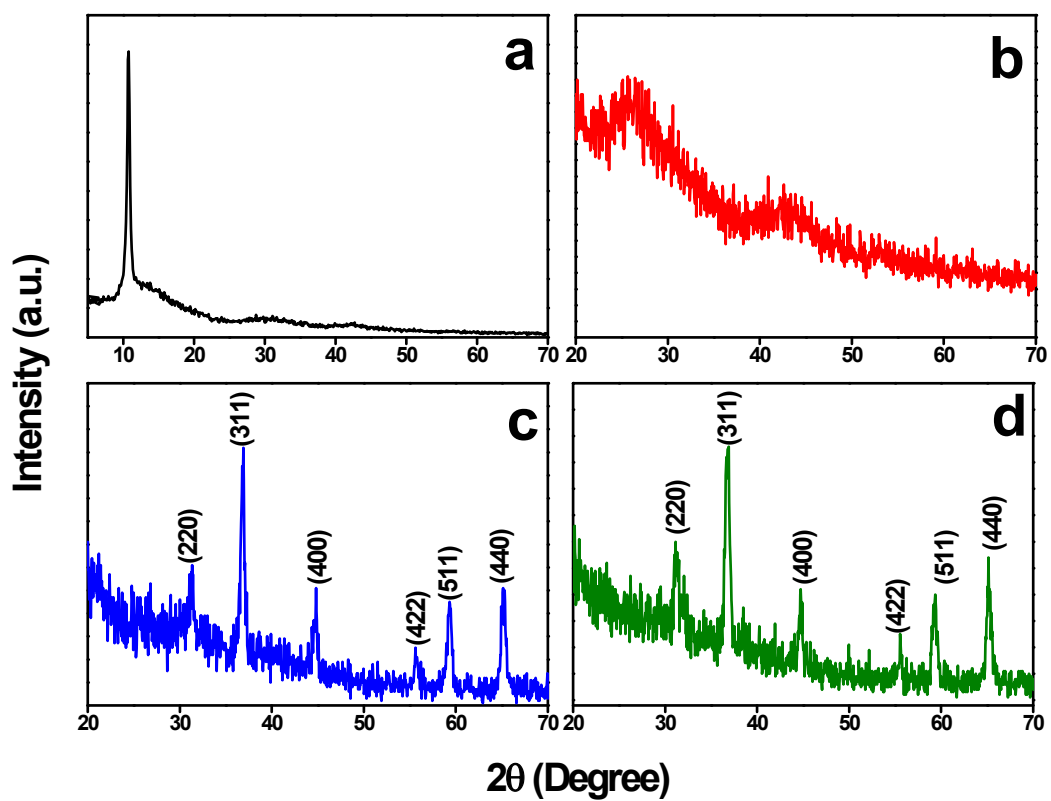

Fig. S1 X-ray diffraction patterns of (a) GO, (b) rGO, (c) Co<sub>3</sub>O<sub>4</sub> nanocubes, and (d) rGO-Co<sub>3</sub>O<sub>4</sub> nanocubes.

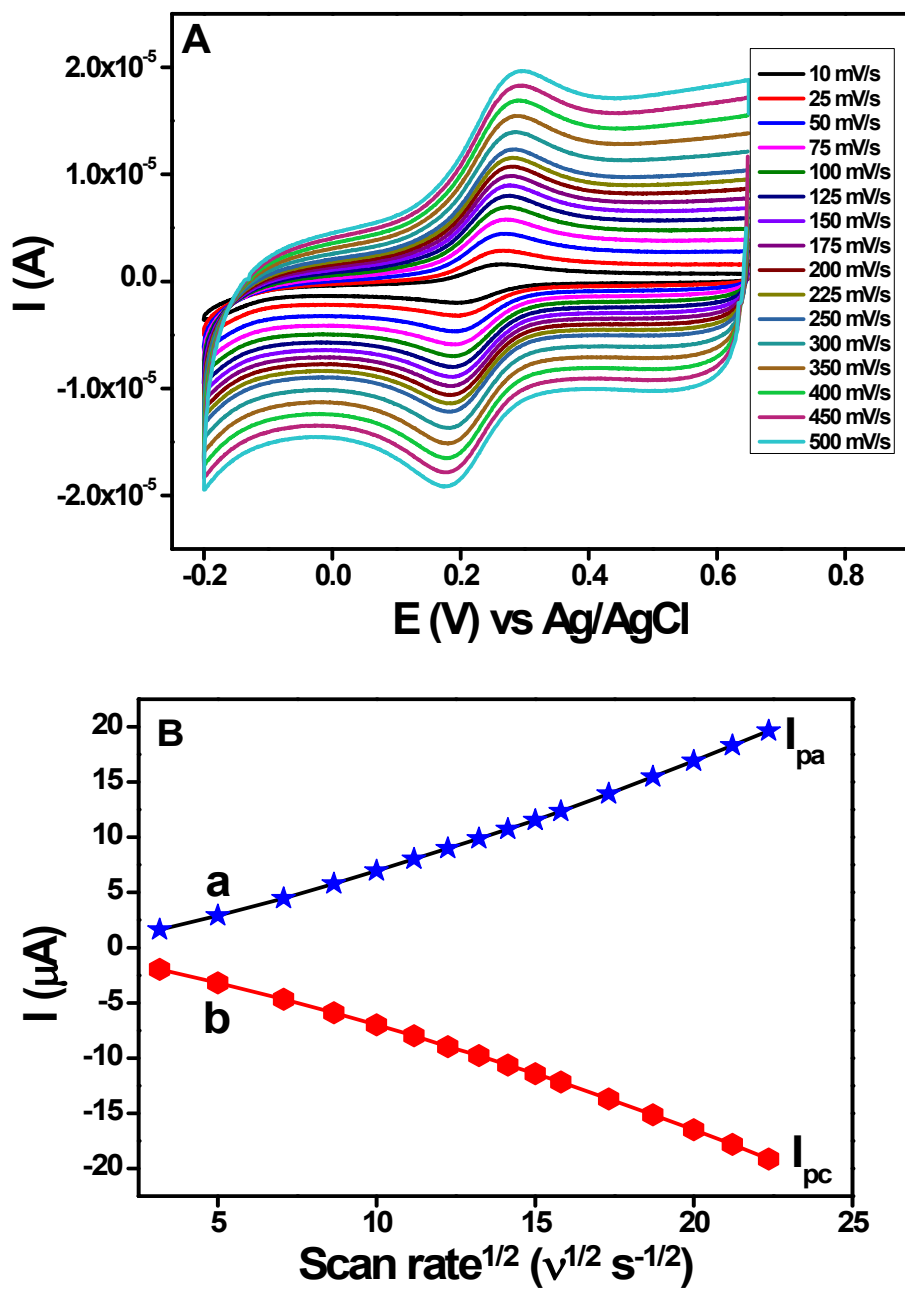

Fig. S2 (A) Cyclic voltammograms recorded for rGO-Co<sub>3</sub>O<sub>4</sub> nanocubes modified electrodes for  $1 \times 10^{-3}$  M K<sub>3</sub>[Fe(CN)<sub>6</sub>] in 0.1 M KCl at different scan rates in range of 10–500 mVs<sup>-1</sup>. (B) Calibration plot obtained for scan rate against (a) anodic and (a) cathodic peak currents.

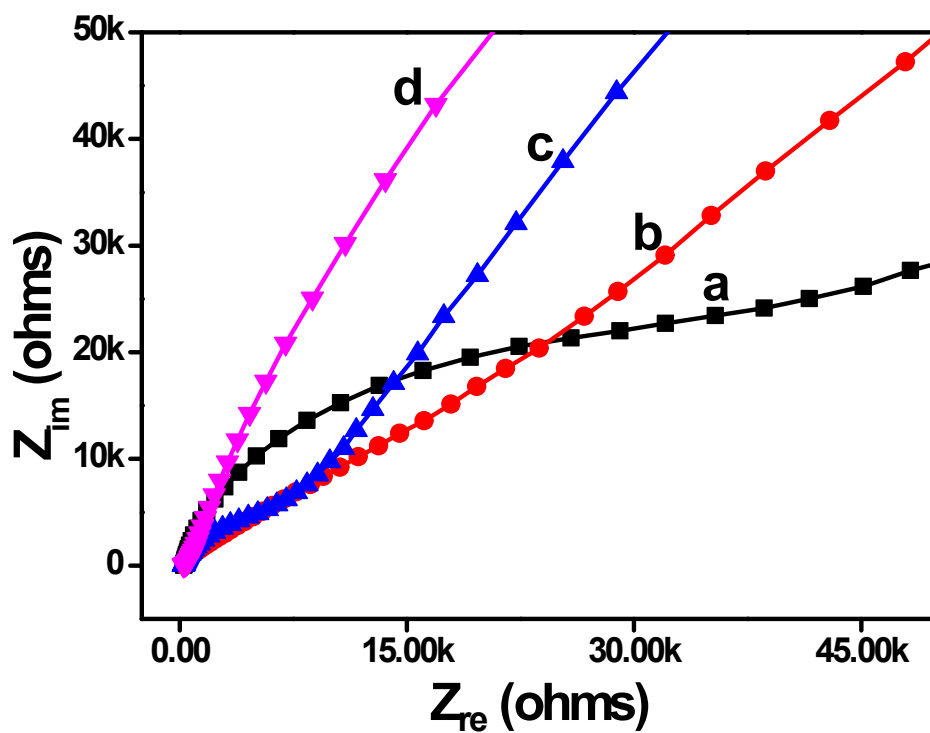

Fig. S3. Expanded view of Nyquist plots obtained for (a) bare Pt, (b) rGO, (c)  $\text{Co}_3\text{O}_4$  nanocubes and (d) rGO- $\text{Co}_3\text{O}_4$  nanocubes modified Pt electrodes for  $1 \times 10^{-3}$  M  $\text{K}_3[\text{Fe}(\text{CN})_6]$  in 0.1 M KCl.

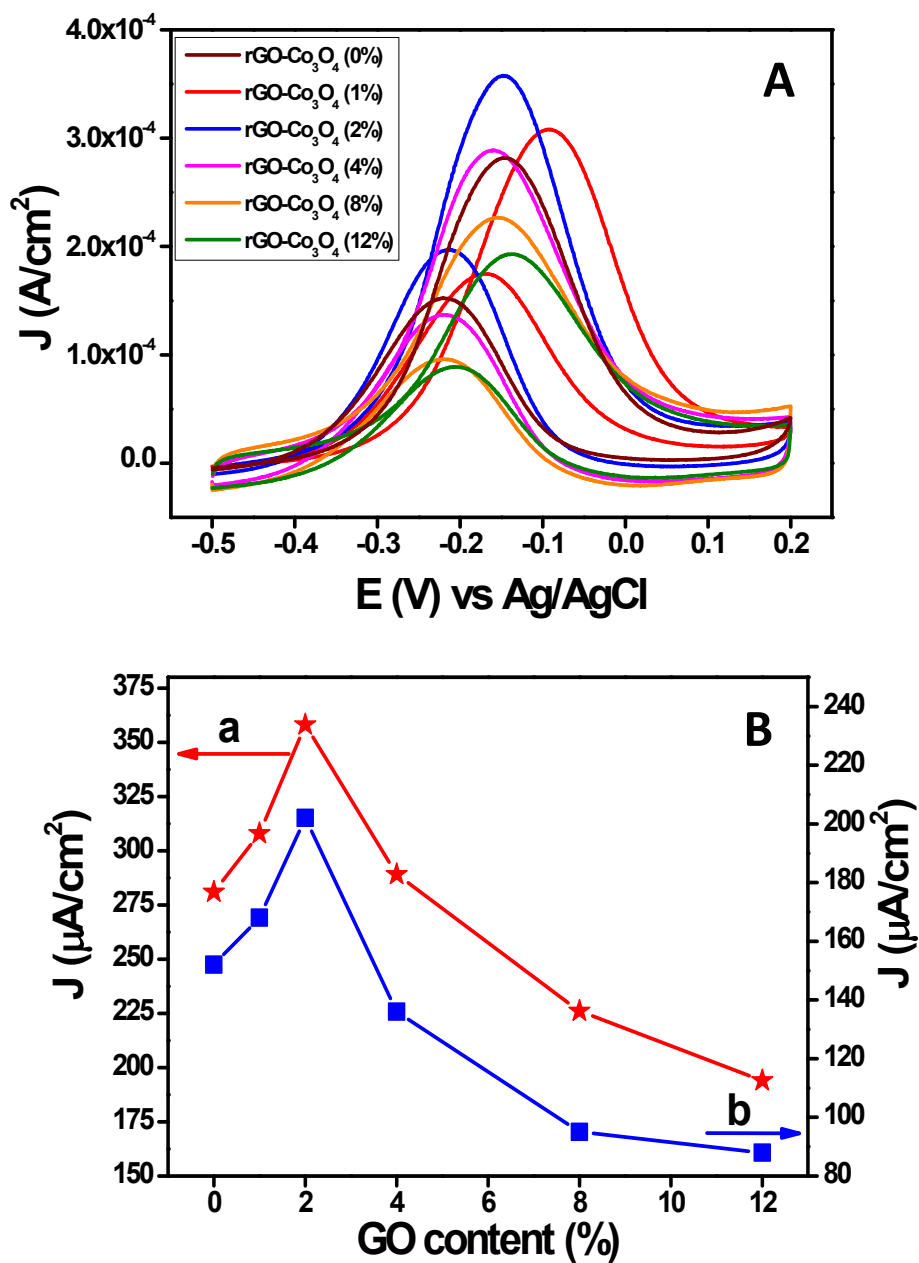

Fig. S4 (A) CV recorded for rGO-Co<sub>3</sub>O<sub>4</sub> nanocubes modified electrodes with different wt. % of GO in presence of 0.1 M CH<sub>3</sub>OH and 0.1 M KOH at scan rate of 50 mVs<sup>-1</sup>. (B) Plots of GO content (wt. %) in rGO-Co<sub>3</sub>O<sub>4</sub> vs. peak current density obtained during (a) forward and (b) reverse scans.
